# Supplementary material
Source: publisher figshare collection journal article supplement (https://acs.figshare.com/ndownloader/files/31377832)
Supplement: Supplementary file 1 [file 31377832]

**Guest-Induced Reversible Phase Transformation of Organic-Inorganic Phenylpiperazinium Antimony (III) Chlorides with Solvatochromic Photoluminescence**

*Xianli Li<sup>a,†</sup>, Chao Peng<sup>c,†</sup>, Yonghong Xiao<sup>a</sup>, Dongfeng Xue<sup>c,\*</sup>, Binbin Luo<sup>a,b,\*</sup>, and*

*Xiao-Chun Huang<sup>a,b,\*</sup>*

*<sup>a</sup> Department of Chemistry and Key Laboratory for Preparation and Application of Ordered Structural Materials of Guangdong Province, Shantou University, Shantou, Guangdong Province 515063, P. R. China*

*<sup>b</sup> Guangdong Laboratory of Chemistry and Fine Chemical Industry Jieyang Center, Jieyang, Guangdong Province 522000, P. R. China*

*<sup>c</sup> Multiscale Crystal Materials Research Center, Shenzhen Institute of Advanced Technology, Chinese Academy of Sciences, Shenzhen, Guangdong Province 518055, P. R. China*

Email: df.xue@siat.ac.cn; bbluo@stu.edu.cn; xchuang@stu.edu.cn

## EXPERIMENTAL SECTION

### Materials and methods

1-Phenylpiperazine (98%, Energy Chemical), antimony trichloride (99%, Alfa), HCl (37%, Guanghua Scientific), n-hexane (AR, Xilong Scientific), ethyl acetate (AR, Xilong Scientific), ethanol (AR, Xilong Scientific), methanol (AR, Xilong Scientific), acetone (AR, Xilong Scientific). All chemicals were used without further purification.

### Synthesis of $(\text{PhPi})_2\text{SbCl}_7 \cdot x\text{H}_2\text{O}$ single crystal

$(\text{PhPi})_2\text{SbCl}_7 \cdot x\text{H}_2\text{O}$  single crystals were synthesized by mixing PhPi (0.2 mmol),  $\text{SbCl}_3$  (0.1 mmol) and HCl (0.3 mL) into a 15 mL vessel equipped with a Teflon screw cap at 100 °C. After solids were totally dissolved, the precursors were cooled to room temperature to get block-like crystals.

### Phase Transformation from $(\text{PhPi})_2\text{SbCl}_7 \cdot x\text{H}_2\text{O}$ to $(\text{PhPi})_2\text{SbCl}_7\text{-V}$

$(\text{PhPi})_2\text{SbCl}_7 \cdot x\text{H}_2\text{O}$  block-like crystals were placed in a 50 mL Schlenk flask. After the vacuum treatment for 2 hours at room temperature, colorless microcrystals of  $(\text{PhPi})_2\text{SbCl}_7\text{-V}$  were obtained.

### Phase Transformation from $(\text{PhPi})_2\text{SbCl}_7 \cdot x\text{H}_2\text{O}$ to $(\text{PhPi})_2\text{SbCl}_7\text{-S}$

$(\text{PhPi})_2\text{SbCl}_7\text{-S}$  crystals were prepared by injecting 20 mL acetone (or methanol, ethanol, tetrahydrofuran, dioxane) into  $(\text{PhPi})_2\text{SbCl}_7\text{-V}$  (0.1 g) for 1 day or refluxing  $(\text{PhPi})_2\text{SbCl}_7 \cdot x\text{H}_2\text{O}$  in acetone for 2 hours and placed overnight to get block-like microcrystals.

### Synthesis of $(\text{PhPi})\text{Cl}_2$

$(\text{PhPi})\text{Cl}_2$  were obtained by adding HCl (2 mmol) into 1 mmol 1-phenylpiperazine in ethanol at 0 °C with vigorous stirring. The pale yellow solids of  $(\text{PhPi})\text{Cl}_2$  were precipitated by adding ethyl acetate.

### Characterization

**Single crystal X-ray diffraction (SC-XRD).** SC-XRD tests were performed on Rigaku XtaLab Pro MM007HF DWX diffractometer at 298 K using Cu K $\alpha$  radiation ( $\lambda = 1.5418 \text{ \AA}$ ). The structures were solved by intrinsic phasing method using SHELXT<sup>1</sup> program implanted in Olex2<sup>2</sup>. Refinement with full matrix least squares techniques on  $F^2$  was performed by using SHELXL<sup>3</sup>. Non-hydrogen atoms were anisotropically refined and all hydrogen atoms were generated based on riding mode.

**Powder X-ray diffraction.** PXRD patterns were recorded on MiniFlex 600 (Rigaku) to examine the crystalline phase

**UV-vis absorption.** UV-vis spectra were measured on Lambda 950 UV-vis Spectrometer

(PerkinElmer).

**Photoluminescence (PL) spectra and excitation (PLE) spectra.** Both of PL and PLE spectra were collected on PTI QM-TM (Photon Technology International).

**Absolute PL QY.** Absolute PL QY was recorded on a HAMAMATSU C11347 spectrometer with integrating sphere with the excitation wavelength of 340 nm for all samples.

**Thermogravimetric analyses (TGA).** TGA were performed on a SHMADZU TA-50 thermal analyzer with a heating rate of 10 °C min<sup>-1</sup> from 30 to 700 °C under nitrogen gas flow

**Photoluminescence lifetime.** PL lifetime tests were collected on Edinburgh Instruments (FL 900). The PL decay curves are fitted with exponential function as given in the following expression:

$$I(t) = \sum_n^{i=1} A_i e^{-\frac{t}{\tau_i}}$$

where  $I(t)$  is the PL intensity at time  $t$ ,  $t$  is the time,  $A_i$  represents the relative weights of the decay components at  $t = 0$ ,  $\tau_i$  denotes the decay time for the exponential components. The average lifetime is calculated based on the expression below:

$$\tau_{ave} = \sum_n^{i=1} A_i \tau_i^2 / \sum_n^{i=1} A_i \tau_i$$

**Density function theory (DFT) calculation.** Spin-polarized DFT calculations were conducted using the Vienna Ab-Initio Simulation Package (VASP).<sup>4-5</sup> The Perdew-Burke-Ernzerhof (PBE) functional within the Generalized Gradient Approximation (GGA) was applied to treat the exchange-correlation.<sup>5-7</sup> The projector-augmented wave (PAW) method was used to describe the core electrons.<sup>8-9</sup> The valence electronic states were expanded in plane-wave basis sets with a cutoff energy of 450 eV. The force convergence criterion was set to 0.03 eV/Å. The DFT-D3 method with Becke-Johnson (BJ) damping was used to describe the dispersion interactions.<sup>10-11</sup> During geometry optimization, all atoms were allowed to relax with the lattice constant being fixed. We used a k-mesh of (3×1×4) to optimize the structure of the (PhPi)<sub>2</sub>SbCl<sub>7</sub>-V and k-meshes of (2×1×4) and (4×4×2) for (PhPi)<sub>2</sub>SbCl<sub>7</sub>·xH<sub>2</sub>O and (PhPi)<sub>2</sub>SbCl<sub>7</sub>-S, respectively.

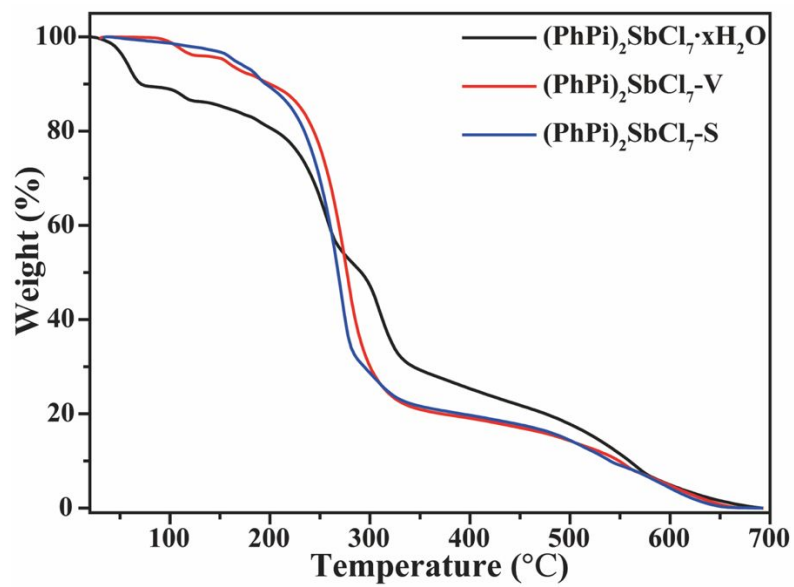

**Figure S1.** TGA of  $(\text{PhPi})_2\text{SbCl}_7 \cdot x\text{H}_2\text{O}$ ,  $(\text{PhPi})_2\text{SbCl}_7\text{-V}$  and  $(\text{PhPi})_2\text{SbCl}_7\text{-S}$ .

**Table S1** Crystal data of (PhPi)<sub>2</sub>SbCl<sub>7</sub>·xH<sub>2</sub>O, (PhPi)<sub>2</sub>SbCl<sub>7</sub>-V and (PhPi)<sub>2</sub>SbCl<sub>7</sub>-S

|                                                                           | (PhPi) <sub>2</sub> SbCl <sub>7</sub> ·xH <sub>2</sub> O                         | (PhPi) <sub>2</sub> SbCl <sub>7</sub> -V                          | (PhPi) <sub>2</sub> SbCl <sub>7</sub> -S                          |
|---------------------------------------------------------------------------|----------------------------------------------------------------------------------|-------------------------------------------------------------------|-------------------------------------------------------------------|
| Empirical formula                                                         | C <sub>20</sub> H <sub>36</sub> Cl <sub>7</sub> N <sub>4</sub> O <sub>2</sub> Sb | C <sub>20</sub> H <sub>32</sub> Cl <sub>7</sub> N <sub>4</sub> Sb | C <sub>20</sub> H <sub>32</sub> Cl <sub>7</sub> N <sub>4</sub> Sb |
| Formula weight                                                            | 734.43                                                                           | 698.39                                                            | 698.39                                                            |
| Temperature/K                                                             | 298.86(10)                                                                       | 298.3(7)                                                          | 298(2)                                                            |
| Radiation                                                                 | Cu K $\alpha$ ( $\lambda$ = 1.54184 Å)                                           | Cu K $\alpha$ ( $\lambda$ = 1.54184 Å)                            | Cu K $\alpha$ ( $\lambda$ = 1.54184 Å)                            |
| Crystal system                                                            | monoclinic                                                                       | monoclinic                                                        | triclinic                                                         |
| Space group                                                               | <i>C2/c</i>                                                                      | <i>C2/c</i>                                                       | <i>P</i> $\bar{1}$                                                |
| <i>a</i> /Å                                                               | 15.8872(3)                                                                       | 12.74300(10)                                                      | 10.2371(3)                                                        |
| <i>b</i> /Å                                                               | 27.0504(5)                                                                       | 28.0958(3)                                                        | 10.6199(3)                                                        |
| <i>c</i> /Å                                                               | 8.1864(2)                                                                        | 8.45780(10)                                                       | 15.4570(3)                                                        |
| $\alpha$ /°                                                               | 90                                                                               | 90                                                                | 99.953(2)                                                         |
| $\beta$ /°                                                                | 101.837(2)                                                                       | 103.0480(10)                                                      | 102.546(2)                                                        |
| $\gamma$ /°                                                               | 90                                                                               | 90                                                                | 114.672(3)                                                        |
| <i>V</i> /Å <sup>3</sup>                                                  | 3443.33(13)                                                                      | 2949.92(5)                                                        | 1423.28(7)                                                        |
| <i>Z</i>                                                                  | 4                                                                                | 4                                                                 | 2                                                                 |
| $\rho_{calc}$ (g/cm <sup>3</sup> )                                        | 1.417                                                                            | 1.573                                                             | 1.630                                                             |
| completeness to $\theta_{max}$                                            | 97%                                                                              | 100%                                                              | 99%                                                               |
| GOF                                                                       | 1.089                                                                            | 1.257                                                             | 1.095                                                             |
| <i>R</i> <sub>int</sub>                                                   | 0.0352                                                                           | 0.0173                                                            | 0.0376                                                            |
| final <i>R</i> indexes [ <i>I</i> > 2 $\sigma$ ( <i>I</i> )] <sup>a</sup> | <i>R</i> <sub>I</sub> = 0.0294, <i>wR</i> <sub>2</sub> = 0.0827                  | <i>R</i> <sub>I</sub> = 0.0644, <i>wR</i> <sub>2</sub> = 0.1766   | <i>R</i> <sub>I</sub> = 0.0444, <i>wR</i> <sub>2</sub> = 0.1228   |
| <i>R</i> indexes (all data) <sup>a</sup>                                  | <i>R</i> <sub>I</sub> = 0.0311, <i>wR</i> <sub>2</sub> = 0.0835                  | <i>R</i> <sub>I</sub> = 0.0655, <i>wR</i> <sub>2</sub> = 0.1770   | <i>R</i> <sub>I</sub> = 0.0488, <i>wR</i> <sub>2</sub> = 0.1255   |
| largest diff. peak and hole, e Å <sup>-3</sup>                            | 0.52/-0.63                                                                       | 0.94/-0.79                                                        | 1.67/-1.10                                                        |

<sup>a</sup>  $R_I = \Sigma ||F_o| - |F_c|| / \Sigma |F_o|$ ;  $wR_2 = \{[\Sigma w(F_o^2 - F_c^2)^2] / \Sigma [w(F_o^2)^2]\}^{1/2}$ ;  $w = 1/[\sigma^2(F_o^2) + (aP)^2 + bP]$ , where  $P = [\max(F_o^2, 0) + 2Fc^2]/3$  for all data.

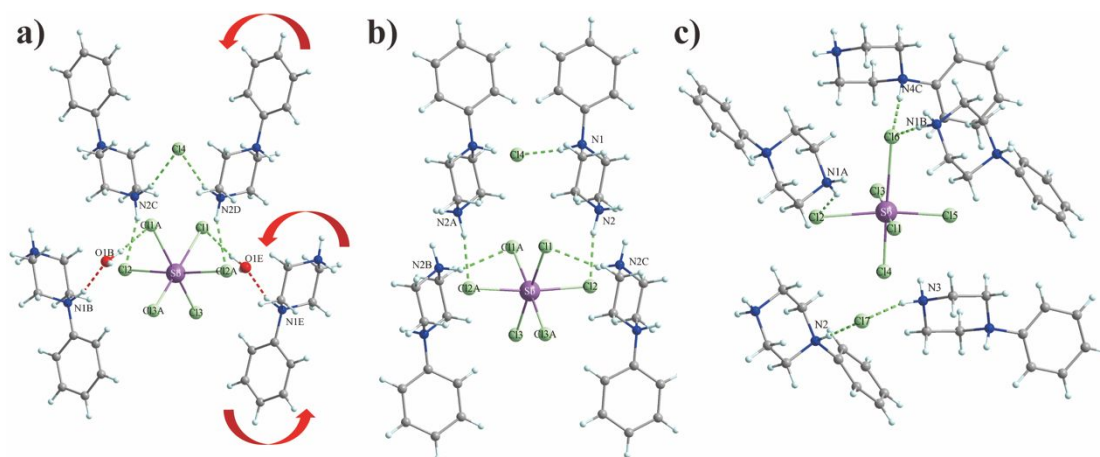

**Figure S2.** Hydrogen bonding interaction (denoted by dash line) in (a)  $(\text{PhPi})_2\text{SbCl}_7 \cdot x\text{H}_2\text{O}$ , (b)  $(\text{PhPi})_2\text{SbCl}_7\text{-V}$  and (c)  $(\text{PhPi})_2\text{SbCl}_7\text{-S}$ . The arrows in (a) denote the rotary direction of PhPi cations after phase transformation from  $(\text{PhPi})_2\text{SbCl}_7 \cdot x\text{H}_2\text{O}$  to  $(\text{PhPi})_2\text{SbCl}_7\text{-V}$ .

As for  $(\text{PhPi})_2\text{SbCl}_7 \cdot x\text{H}_2\text{O}$ , the occupancy of  $\text{PhPi}^{2+}$ , Cl1, Cl2 and Cl3 is 1.0, while that of Sb1 and Cl4 is 0.5 in the asymmetric unit. The similar occupancy is happened in  $(\text{PhPi})_2\text{SbCl}_7\text{-V}$ , except for the disordered Cl4. For this free Cl in  $(\text{PhPi})_2\text{SbCl}_7\text{-V}$ , Cl4 and Cl4A contribute the occupancy of 0.5 in total. The occupancy of all atoms in the asymmetric unit is 1.0 in  $(\text{PhPi})_2\text{SbCl}_7\text{-S}$ . The disordered Cl5 and Cl5A contribute occupancy of 1.0 in total.

**Table S2.** Bond length of (PhPi)<sub>2</sub>SbCl<sub>7</sub>·xH<sub>2</sub>O

| Bond               | Length (Å) |
|--------------------|------------|
| Sb-Cl1             | 2.907(1)   |
| Sb-Cl2             | 2.683(1)   |
| Sb-Cl3             | 2.448(1)   |
| Sb-Cl1A            | 2.907(1)   |
| Sb-Cl2A            | 2.683(1)   |
| Sb-Cl3A            | 2.448(1)   |
| Standard deviation | 0.187      |

A: 1-X, +Y, -0.5-Z

**Table S3.** Bond length of (PhPi)<sub>2</sub>SbCl<sub>7</sub>-V

| Bond               | Length (Å) |
|--------------------|------------|
| Sb-Cl1             | 2.833(3)   |
| Sb-Cl2             | 2.665(3)   |
| Sb-Cl3             | 2.501(3)   |
| Sb-Cl1A            | 2.833(3)   |
| Sb-Cl2A            | 2.665(3)   |
| Sb-Cl3A            | 2.501(3)   |
| Standard deviation | 0.136      |

A: 1-X, +Y, 1.5-Z

**Table S4.** Bond length of (PhPi)<sub>2</sub>SbCl<sub>7</sub>-S

| Bond               | Length (Å) |
|--------------------|------------|
| Sb-Cl1             | 2.799(2)   |
| Sb-Cl2             | 2.788(2)   |
| Sb-Cl3             | 2.511(2)   |
| Sb-Cl4             | 2.420(2)   |
| Sb-Cl5A            | 2.575(8)   |
| Sb-Cl5             | 2.526(2)   |
| Sb-Cl6             | 3.143(1)   |
| Standard deviation | 0.244      |

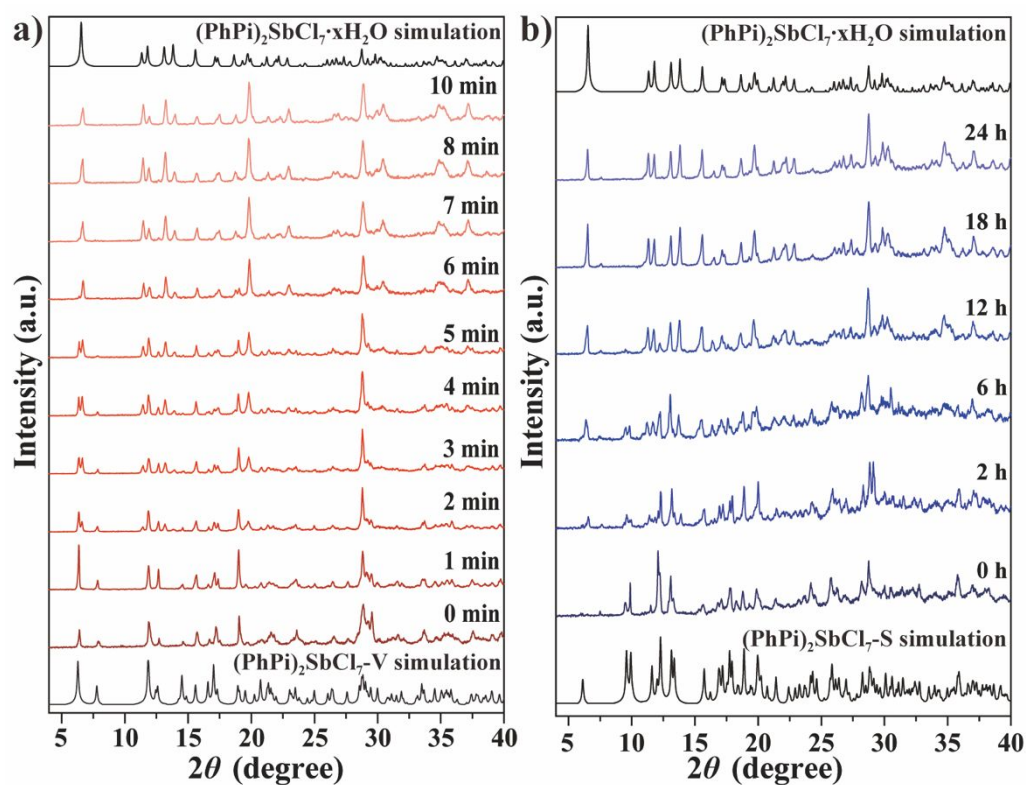

**Figure S3.** PXRD of (a)  $(\text{PhPi})_2\text{SbCl}_7\text{-V}$  and (b)  $(\text{PhPi})_2\text{SbCl}_7\text{-S}$  powders by placing in open air at different time.

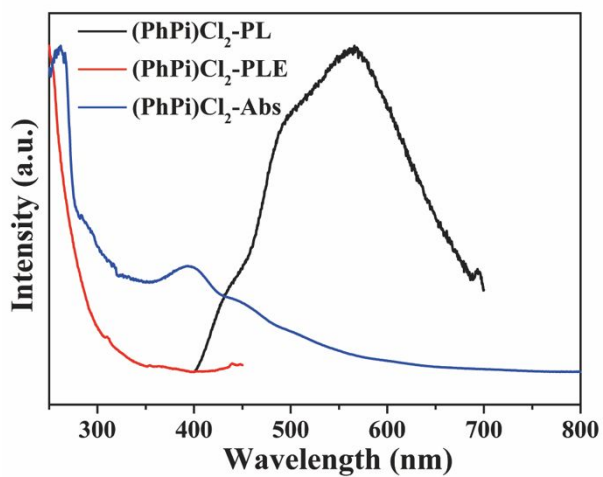

**Figure S4.** Absorption, PL and PLE spectra of  $(\text{PhPi})\text{Cl}_2$ .



**Table S5.** PL lifetime of (PhPi)<sub>2</sub>SbCl<sub>7</sub>-V

| $\tau_1$            | $A_1$  | $\tau_2$           | $A_2$ | $\tau_{\text{avg}}$ |
|---------------------|--------|--------------------|-------|---------------------|
| 0.135 $\mu\text{s}$ | 96.2 % | 1.51 $\mu\text{s}$ | 3.8 % | 0.562 $\mu\text{s}$ |

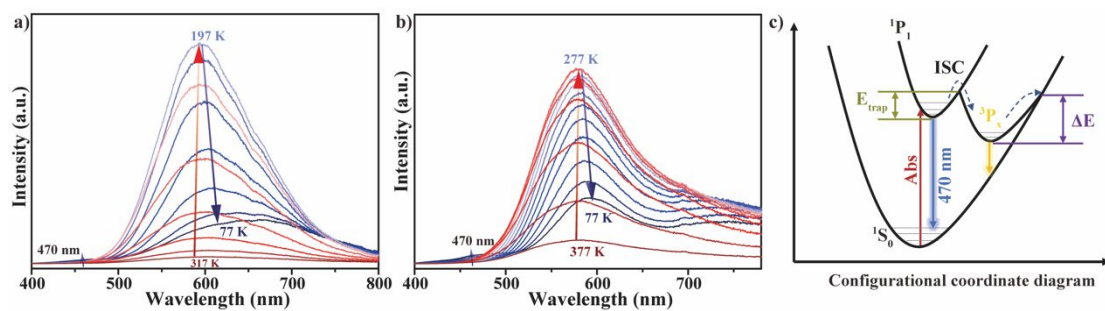

**Figure S5.** Temperature-dependent PL of (PhPi)<sub>2</sub>SbCl<sub>7</sub>-V (a) and (PhPi)<sub>2</sub>SbCl<sub>7</sub>-S (b), 355 nm is used as the excitation wavelength. (c) Configurational coordinate diagram showing the thermal activation energy and energy barrier of phonon-assisted nonradiative recombination.

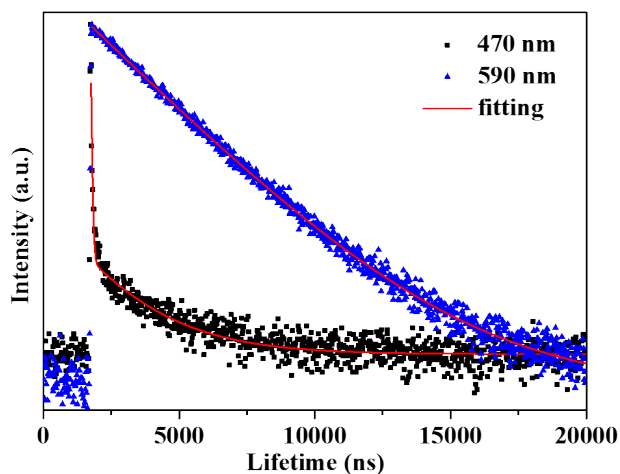

**Figure S6.** TRPL of (PhPi)<sub>2</sub>SbCl<sub>7</sub>-V at 77 K. 355 nm is used as the excitation wavelength.

**Table S6.** Fitting results of PL decay at 470 nm for (PhPi)<sub>2</sub>SbCl<sub>7</sub>-V at 77 K

| $\tau_1$            | $A_1$ | $\tau_2$            | $A_2$ | $\tau_{\text{avg}}$ |
|---------------------|-------|---------------------|-------|---------------------|
| 0.040 $\mu\text{s}$ | 92.4% | 2.322 $\mu\text{s}$ | 7.6%  | 1.931 $\mu\text{s}$ |

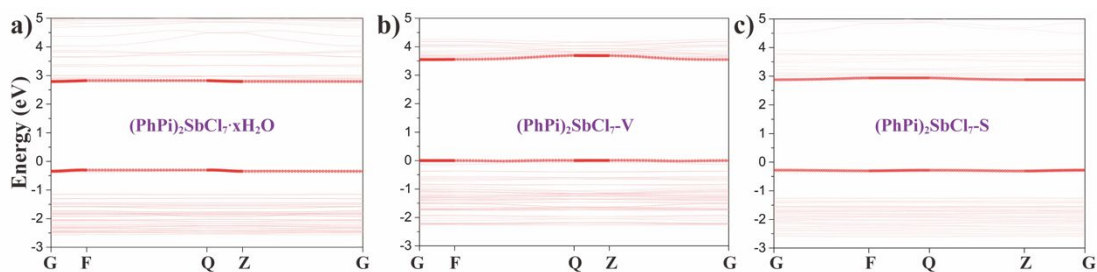

**Figure S7.** The band structures of (PhPi)<sub>2</sub>SbCl<sub>7</sub>-xH<sub>2</sub>O (a), (PhPi)<sub>2</sub>SbCl<sub>7</sub>-V (b) and (PhPi)<sub>2</sub>SbCl<sub>7</sub>-S (c), respectively.

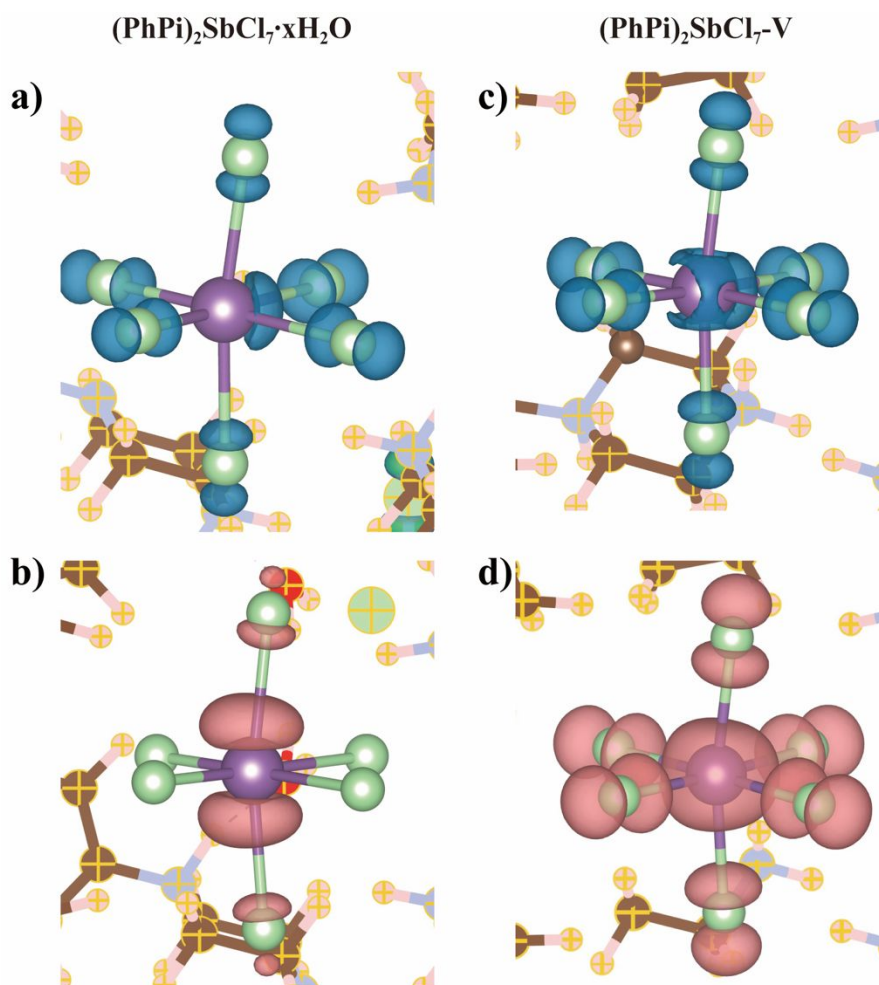

**Figure S8.** The charge density contours of the photogenerated hole (a, c) and the photogenerated electron (b, d) in (PhPi)<sub>2</sub>SbCl<sub>7</sub>-xH<sub>2</sub>O and (PhPi)<sub>2</sub>SbCl<sub>7</sub>-V

## REFERENCE:

1. Sheldrick, G. M., SHELXT-Integrated Space-Group and Crystal-Structure Determination. *Acta Cryst. A* **2015**, *71*, 3-8.
2. Dolomanov, O. V.; Bourhis, L. J.; Gildea, R. J.; Howard, J. A. K.; Puschmann, H., OLEX2: A Complete Structure Solution, Refinement and Analysis Program. *J. Appl. Crystallogr.* **2009**, *42* (2), 339-341.
3. Sheldrick, G. M., A Short History of SHELX. *Acta Cryst. A* **2008**, *64*, 112-122.
4. Kresse, G.; Furthmüller, J., Efficient Iterative Schemes for *ab-Initio* Total-Energy Calculations Using a Plane-Wave Basis set. *Phys. Rev. B* **1996**, *54* (16), 11169-11186.
5. Kresse, G.; Furthmüller, J., Efficiency of *ab-Initio* Total Energy Calculations for Metals and Semiconductors Using a Plane-Wave Basis Set. *Comput. Mater. Sci.* **1996**, *6* (1), 15-50.
6. Perdew, J. P.; Burke, K.; Ernzerhof, M., Generalized Gradient Approximation Made Simple. *Phys. Rev. Lett.* **1996**, *77* (18), 3865-3868.
7. Kresse, G.; Hafner, J., *Ab Initio* Molecular-Dynamics Simulation of the Liquid-Metal–Amorphous-Semiconductor Transition in Germanium. *Phys. Rev. B* **1994**, *49* (20), 14251-14269.
8. Kresse, G.; Joubert, D., From Ultrasoft Pseudopotentials to the Projector Augmented-Wave Method. *Phys. Rev. B* **1999**, *59* (3), 1758-1775.
9. Blöchl, P. E.; Jepsen, O.; Andersen, O. K., Improved Tetrahedron Method for Brillouin-Zone Integrations. *Phys. Rev. B* **1994**, *49* (23), 16223-16233.
10. Grimme, S.; Ehrlich, S.; Goerigk, L., Effect of the Damping Function in Dispersion Corrected Density Functional Theory. *J. Comput. Chem.* **2011**, *32* (7), 1456-1465.
11. Grimme, S.; Antony, J.; Ehrlich, S.; Krieg, H., A Consistent and Accurate *ab Initio* Parametrization of Density Functional Dispersion Correction (DFT-D) for the 94 Elements H-Pu. *J. Chem. Phys.* **2010**, *132* (15), 154104.
